# Supplementary material
Source: Springer Nature journal article supplement (https://www.springermedizin.de/resource/supplementary/12939_2012_294_MOESM1_ESM.pdf/9550772)
Supplement: MOESM1 [file 9550772]

**Additional File 1: BC Healthy eating and active living initiatives analyzed (61)**

|                             | <b>Lifestyle-based (38)</b>                                                                                                                                                                                                                                                                                                                                                                                                                                                                                                                                                                                                                                                                                                                                                                                                                                | <b>Environment-based (27)</b>                                                                                                                                                                                                                                                                                                                                                                                                                                                                                                                     | <b>Structure-based (7)</b>                                                                                                                                                                                                                                                                                |
|-----------------------------|------------------------------------------------------------------------------------------------------------------------------------------------------------------------------------------------------------------------------------------------------------------------------------------------------------------------------------------------------------------------------------------------------------------------------------------------------------------------------------------------------------------------------------------------------------------------------------------------------------------------------------------------------------------------------------------------------------------------------------------------------------------------------------------------------------------------------------------------------------|---------------------------------------------------------------------------------------------------------------------------------------------------------------------------------------------------------------------------------------------------------------------------------------------------------------------------------------------------------------------------------------------------------------------------------------------------------------------------------------------------------------------------------------------------|-----------------------------------------------------------------------------------------------------------------------------------------------------------------------------------------------------------------------------------------------------------------------------------------------------------|
| <b>Direct (28)</b>          | <ol style="list-style-type: none"> <li>1. Farm to School Salad Bar*</li> <li>2. Food Skills for Families</li> <li>3. Sip Smart BC</li> <li>4. ActNowBC Public Awareness Campaign</li> <li>5. ActNowBC Daily Physical Activity Program*</li> <li>6. Dietitian Services at Healthlink BC</li> <li>7. Healthy Families Walking Challenge</li> <li>8. Prescription for Health</li> <li>9. Healthy Families BC Informed Dining Program</li> <li>10. Public Awareness Campaign around Sodium/sweetened Beverage Reduction</li> <li>11. Physical Activity Line</li> <li>12. Patient Voices Network Peer Coaching Program</li> <li>13. Active Choices-Self Management Program</li> <li>14. Healthy Buddies</li> <li>15. Shapedown BC</li> <li>16. Boomer Friendly Boot Camp</li> <li>17. Hearts in Motion Walking Club</li> <li>18. Power of Sport Tour</li> </ol> | <ol style="list-style-type: none"> <li>1. Farm to school salad bar*</li> <li>2. BC School Fruit and Vegetable Nutritional Program</li> <li>3. ActNow BC Daily Physical Activity Program*</li> <li>4. Guidelines for Food and Beverage Sales in BC Schools</li> <li>5. Transfat Policy under the Public Health Act</li> <li>6. Produce Availability in Remote Communities Initiative</li> <li>7. BC Seniors Community Parks</li> <li>8. Healthy Convenience Store Initiative</li> <li>9. BC Healthy School Network</li> <li>10. Bike BC</li> </ol> | 0                                                                                                                                                                                                                                                                                                         |
| <b>Blueprints (19)</b>      | <ol style="list-style-type: none"> <li>1. Walk BC</li> <li>2. Hub for Action on School Transportation Emissions</li> <li>3. HeartSmart Kids</li> <li>4. Action Schools BC*</li> <li>5. International Walk to School Week</li> <li>6. FreshChoice Kitchens*</li> <li>7. Healthy Eating and Physical Activity Learning Resource</li> <li>8. Nutrition Education Workshops and Resources</li> <li>9. Literacy, Education, Activity and Play (LEAP) BC</li> <li>10. Move for Health day</li> </ol>                                                                                                                                                                                                                                                                                                                                                             | <ol style="list-style-type: none"> <li>1. School Guidelines Support</li> <li>2. Stay Active Eat Healthy</li> <li>3. Healthy Work Environments</li> <li>4. Action Schools BC*</li> <li>5. Healthy Fundraising for Schools</li> <li>6. FreshChoice Kitchens*</li> <li>7. School Milk BC</li> <li>8. Healthy Living Schools Initiative</li> </ol>                                                                                                                                                                                                    | <ol style="list-style-type: none"> <li>1. Promotion Plus Consultation Services</li> </ol>                                                                                                                                                                                                                 |
| <b>Building Blocks (25)</b> | <ol style="list-style-type: none"> <li>1. Community-based Awareness</li> <li>2. Active Communities*</li> <li>3. Breakfast for Learning BC*</li> <li>4. Community Health Promotion Fund*</li> <li>5. Community Food Systems for Healthy Living*</li> <li>6. Success by 6*</li> <li>7. Aboriginal Seed Grant Program</li> <li>8. Girls Only Incentive Program</li> <li>9. Fab 55+ Incentive Program</li> <li>10. Kidsport BC</li> </ol>                                                                                                                                                                                                                                                                                                                                                                                                                      | <ol style="list-style-type: none"> <li>1. Build Environment &amp; Active Transportation (BEAT) BC</li> <li>2. Active Communities*</li> <li>3. Breakfast for Learning BC*</li> <li>4. Community Health Promotion Fund*</li> <li>5. CommunityLINK fund</li> <li>6. Community Food Systems for Healthy Living*</li> <li>7. Success by 6*</li> <li>8. Seed Grant Communities</li> <li>9. Local Motion</li> </ol>                                                                                                                                      | <ol style="list-style-type: none"> <li>1. Everybody Active</li> <li>2. Community Food Action Initiative</li> <li>3. BC Healthy Communities</li> <li>4. Aboriginal Health Initiative Program</li> <li>5. Community Health Promotion Fund*</li> <li>6. Community Food Systems for Healthy Living</li> </ol> |

\*Initiatives have components that fit into multiple categories such as lifestyle-based and environment-based, or blueprint and building blocks.
